# Supplementary material
Source: publisher site journal article supplement (https://www.dovepress.com/get_supplementary_file.php?f=359346.docx)
Supplement: Supplementary file 1 [file get_supplementary_file.php]

**Supplementary Material**

Cross-platform *in-silico* analyses exploring tumor immune microenvironment with prognostic value in triple-negative breast cancer

Victor C. Kok1, 2, *, Charles C.N. Wang2, 3, *, Szu-Han Liao2, De-Lun Chen2

1. Division of Medical Oncology, Kuang Tien General Hospital Cancer Center, Taichung 43303, Taiwan. ORCID: 0000-0003-3440-8154

2. Department of Bioinformatics and Medical Engineering, Asia University, Taichung 41354, Taiwan.

3. Center for Artificial Intelligence and Precision Medicine Research, Asia University, Taichung 41354, Taiwan. ORCID: 0000-0002-7305-3061

*Corresponding authors:

1. Victor C. Kok, MD, MMSc, PhD, FACP

vkok@alumni.harvard.edu

2. Charles C. N. Wang, PhD

[cnwang@asia.edu.tw](mailto:cnwang@asia.edu.tw)

Supplementary Material: 9 supplementary figures and 1 supplementary table

LEGENDS FOR SUPPLEMENTARY FIGURES AND SUPPLEMENTARY TABLES

**Supplementary Fig. S1.** Distribution of triple-negative breast cancer by cancer stage with respect to the stromal score (SS) (left panel) or immune score (IS) (right panel) in 115 patients. There was no statistically significant correlation between SS or IS and the cancer stage.

**Supplementary Fig. S2.** Overall survival of 115 patients with triple-negative breast cancer stratified by the stromal score (low versus high), as per the ESTIMATE gene expression signatures.

**Supplementary Fig. S3.** Overall survival of 115 patients with triple-negative breast cancer stratified by the immune score (low versus high), as per the ESTIMATE gene expression signatures.

**Supplementary Fig. S4.** Cytoscape results showing the inferred immune cell infiltration levels between samples of SS-low/IS-high or SS-high/IS-low TNBC patients.

**Supplementary Fig. S5.** Grouped linear regression showing a statistically significant increase in M2 macrophages in triple-negative breast cancer patients with the SS-low/IS-high versus SS-high/IS-low phenotypes (P < 0.001).

**Supplementary Fig. S6.** Quick view of the number of differentially expressed genes in the context of SS-high/IS-low or SS-low/IS-high triple-negative breast cancer patients (compared to normal adjacent tissues). The KEGG pathway enrichment results are also presented.

**Supplementary Fig. S7a and Fig. S7b.** Gene Set Variation Analysis showing the differential pathway activity. **Fig. S7a** reveals the GSVA of the 370 DEGs of the SS-high/IS-low subgroup. **Fig. S7b** shows the GSVA of the 651 DEGs of the SS-low/IS-high subgroup. Both demonstrate the gene enrichment in the JAK-STAT signaling, T cell receptor signaling, B cell receptor signaling, cytokine-cytokine receptor interaction, TGF-β signaling, and PPAR signaling pathways.

**Supplementary Fig. S8.** Oncoprint (cBioPortal-based) showing the frequency of IL-17 and TRAF3IP2 gene aberrations in ER-negative, HER2-FISH-unamplified, invasive breast cancer patients. IL-17 is a proinflammatory cytokine that signals mainly via the TRAF3 interacting protein 2 (TRAF3IP2), an inflammatory mediator and upstream regulator of several crucial transcription factors such as AP-1 and NF-κB. On the cBioPortal platform, we discovered that 13% of ER-negative, HER2-FISH-unamplified breast cancers harbored IL17RA deep deletions and 25% harbored TRAF3IP2 amplifications.

**Supplementary Fig. S9.** All related genes in the IL-17 signaling pathway were interrogated for differential expression compared to the normal adjacent tissues in either stromal score-high/immune score-low (A) or stromal score-low/immune score-high (B) triple-negative breast cancer patients. The gene list can be found in the KEGG pathways (<https://www.genome.jp/pathway/map04657>).

**Supplementary Table S1.** Gene list of the respective stromal and immune signatures.

**Supplementary Fig. S1**


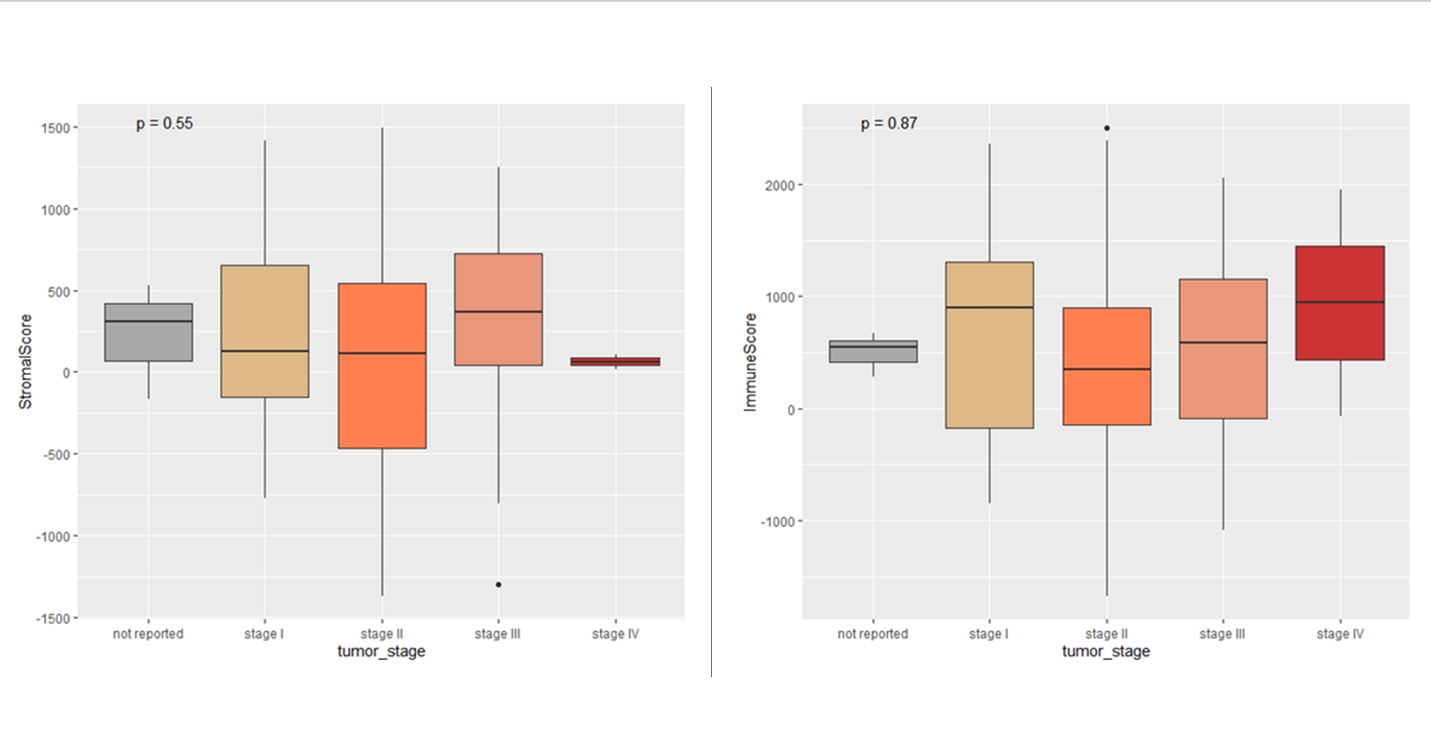


**Fig. S1.** Distribution of triple-negative breast cancer by cancer stage with respect to the stromal score (SS) (left panel) or immune score (IS) (right panel) in 115 patients. There was no statistically significant correlation between SS or IS and the cancer stage.

**Supplementary Fig. S2**


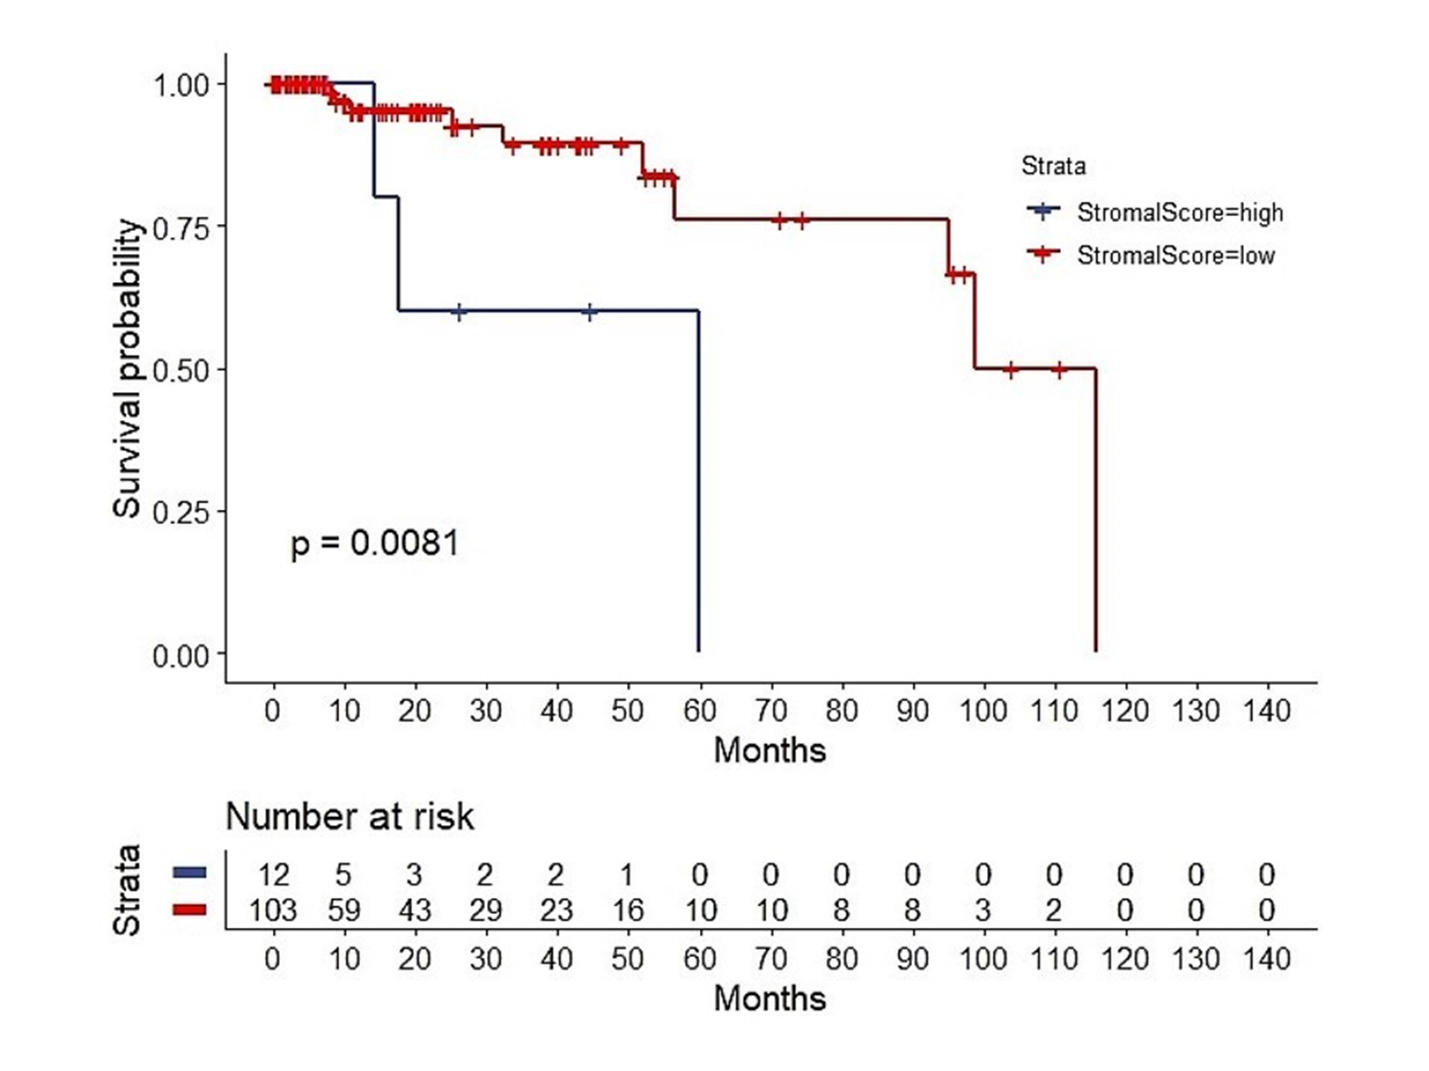


**Fig. S2.** Overall survival of 115 patients with triple-negative breast cancer stratified by the stromal score (low versus high), as per the ESTIMATE gene expression signatures.

**Supplementary Fig. S3**

**
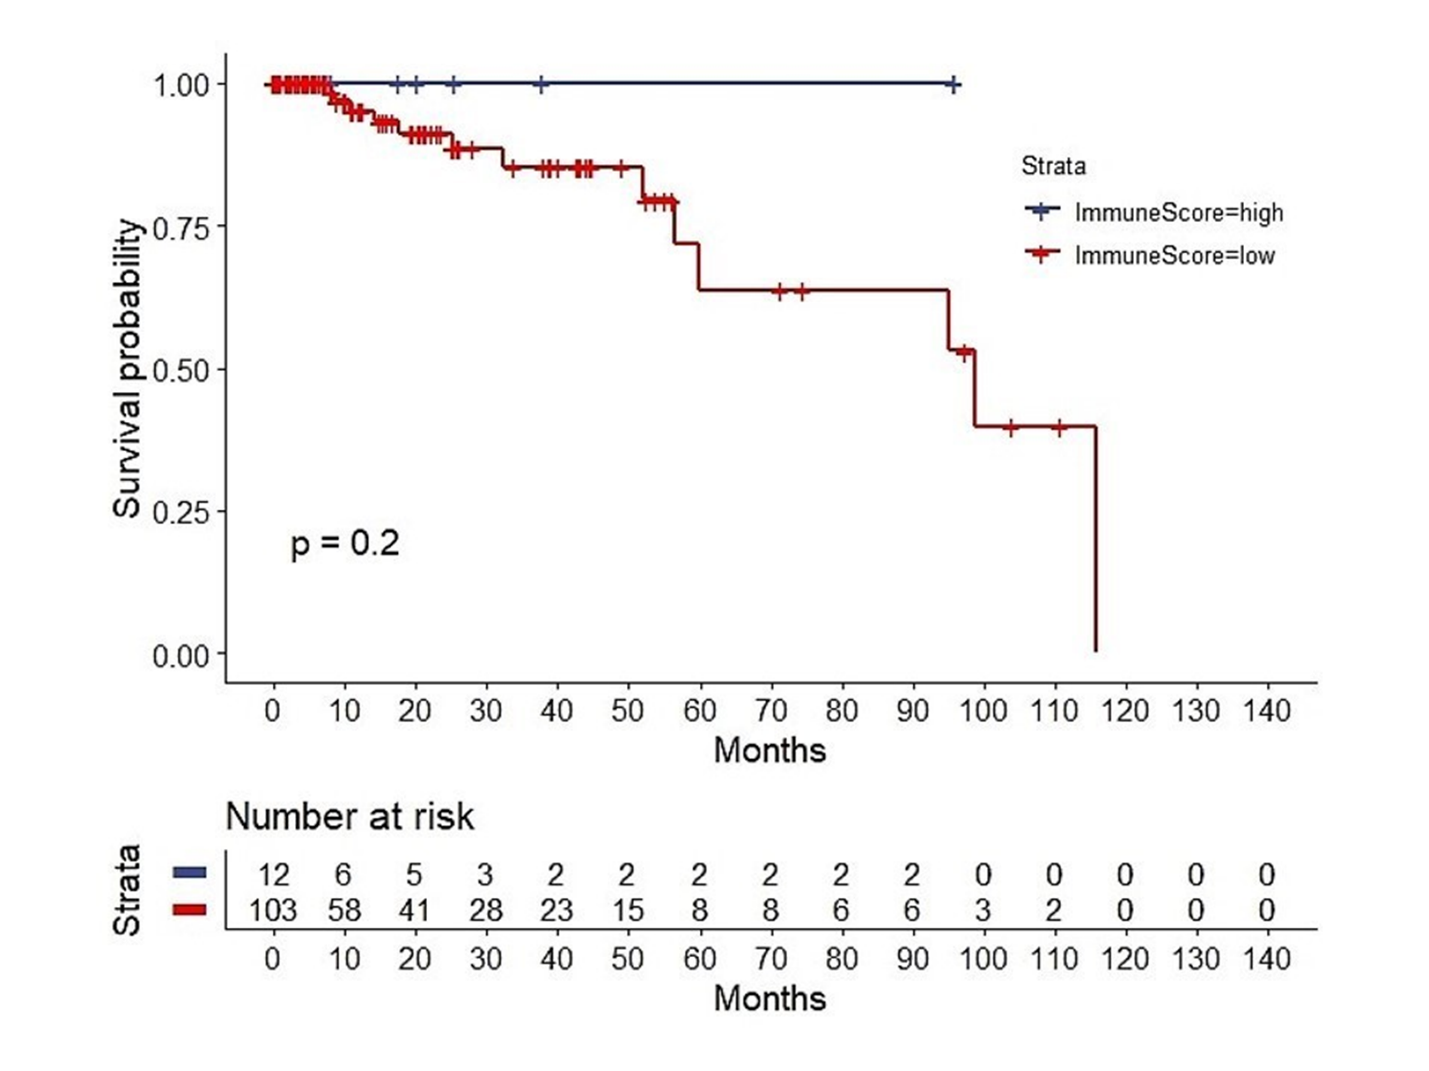
**

**Fig. S3.** Overall survival of 115 patients with triple-negative breast cancer stratified by the immune score (low versus high), as per the ESTIMATE gene expression signatures.

**Supplementary Fig. S4**

**
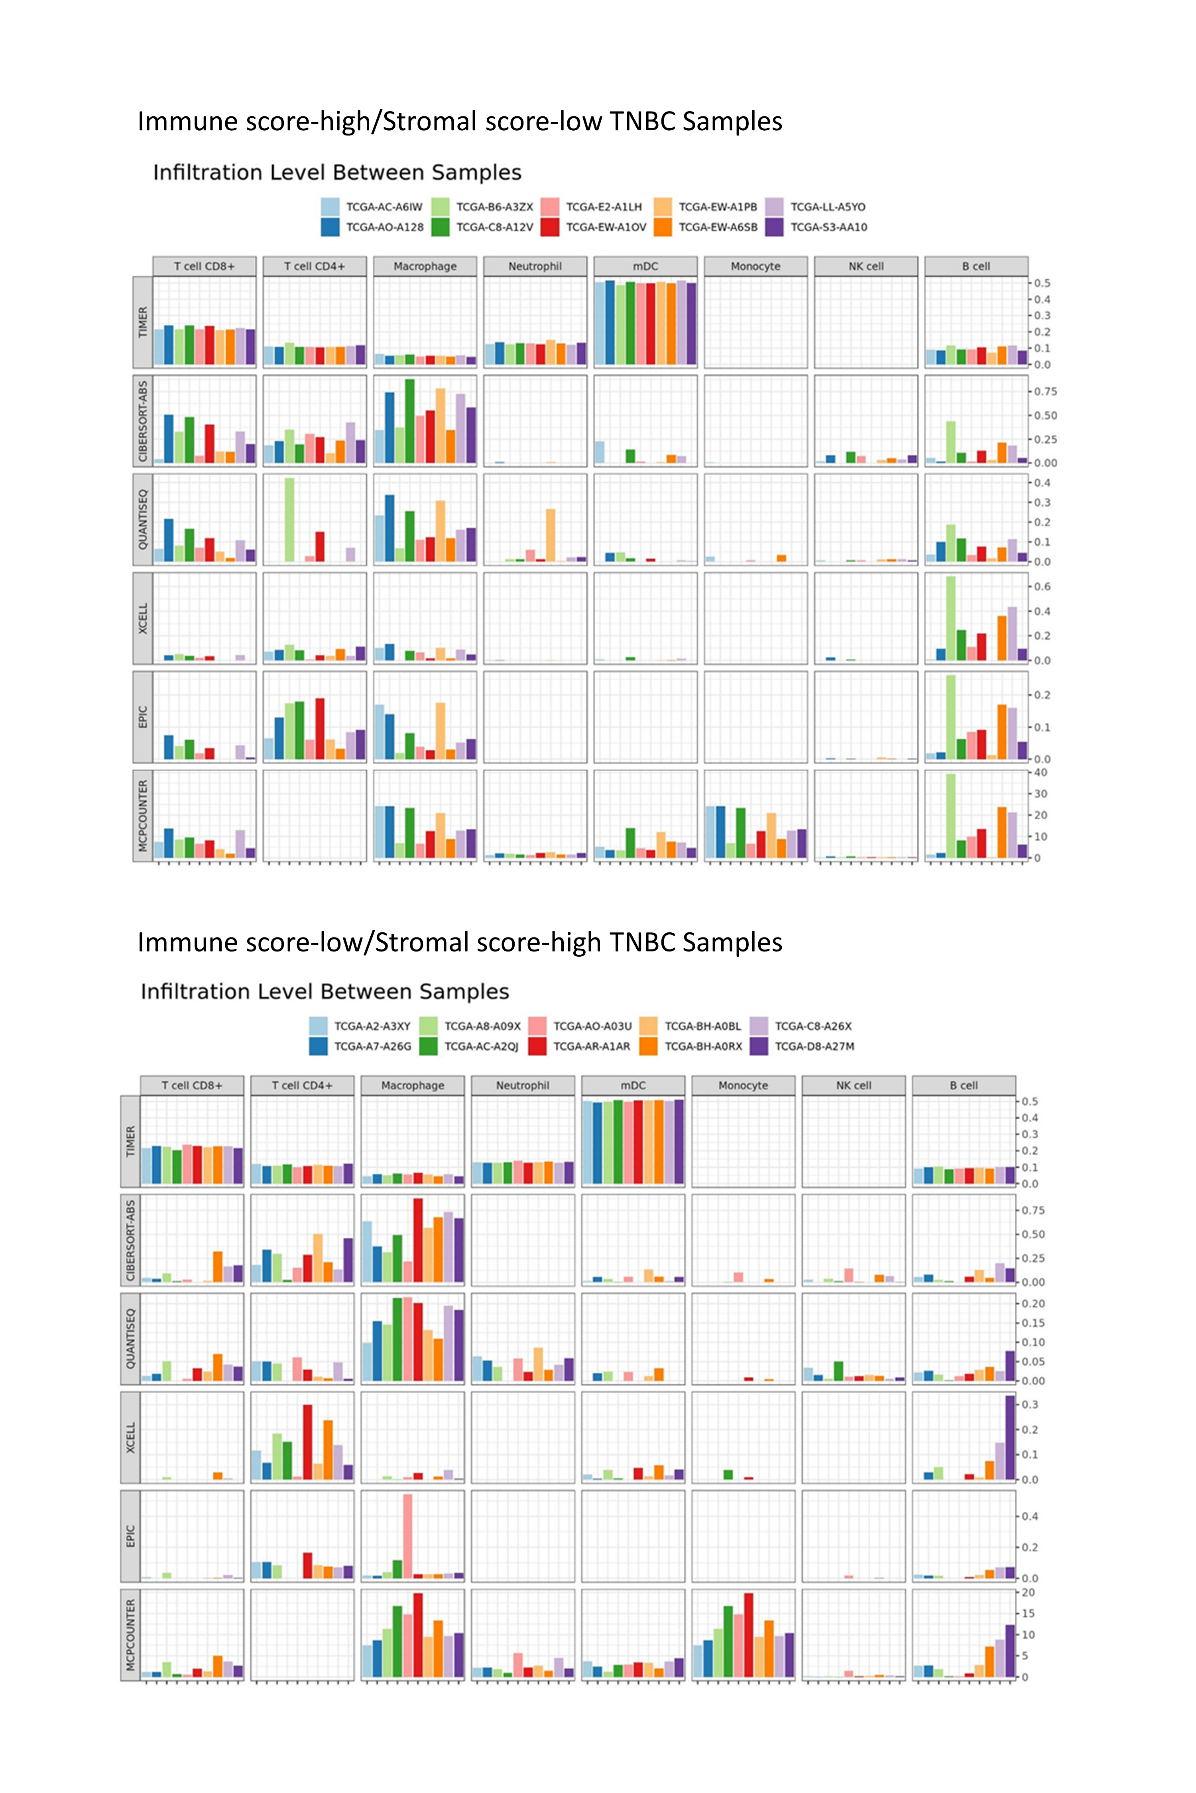
**

**Fig. S4.** Cytoscape results showing the inferred immune cell infiltration levels between samples of SS-low/IS-high or SS-high/IS-low TNBC patients.

**Supplementary Fig. S5**

**
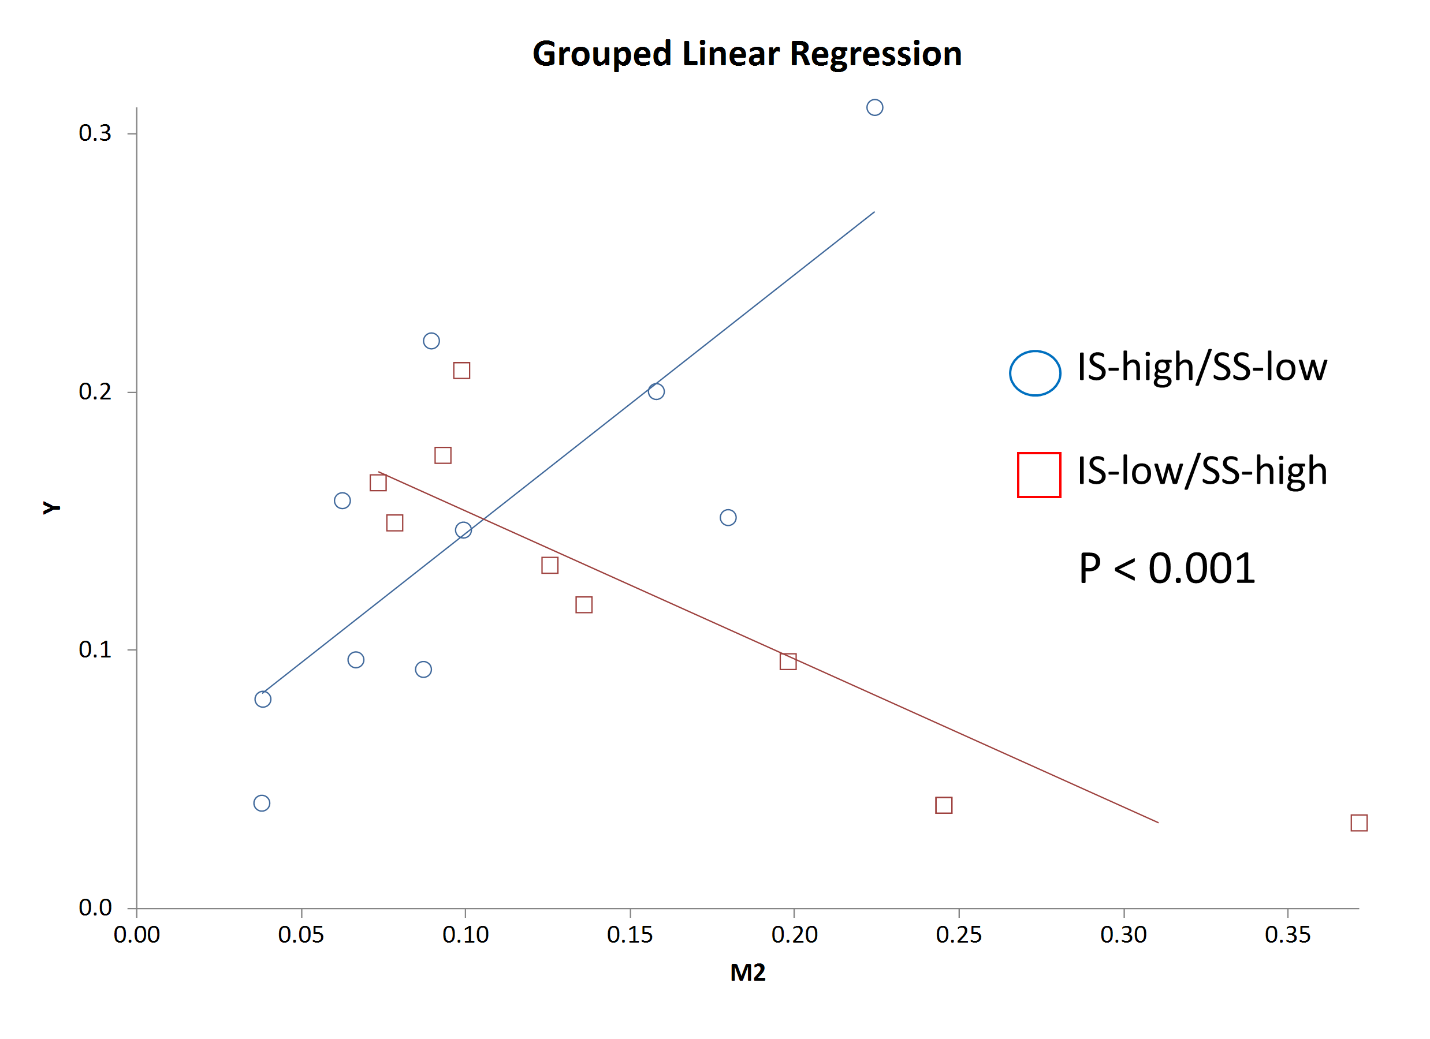
**

**Fig. S5.** Grouped linear regression showing a statistically significant increase in M2 macrophages in triple-negative breast cancer patients with the SS-low/IS-high versus SS-high/IS-low phenotypes (P < 0.001).

**Supplementary Fig. S6**


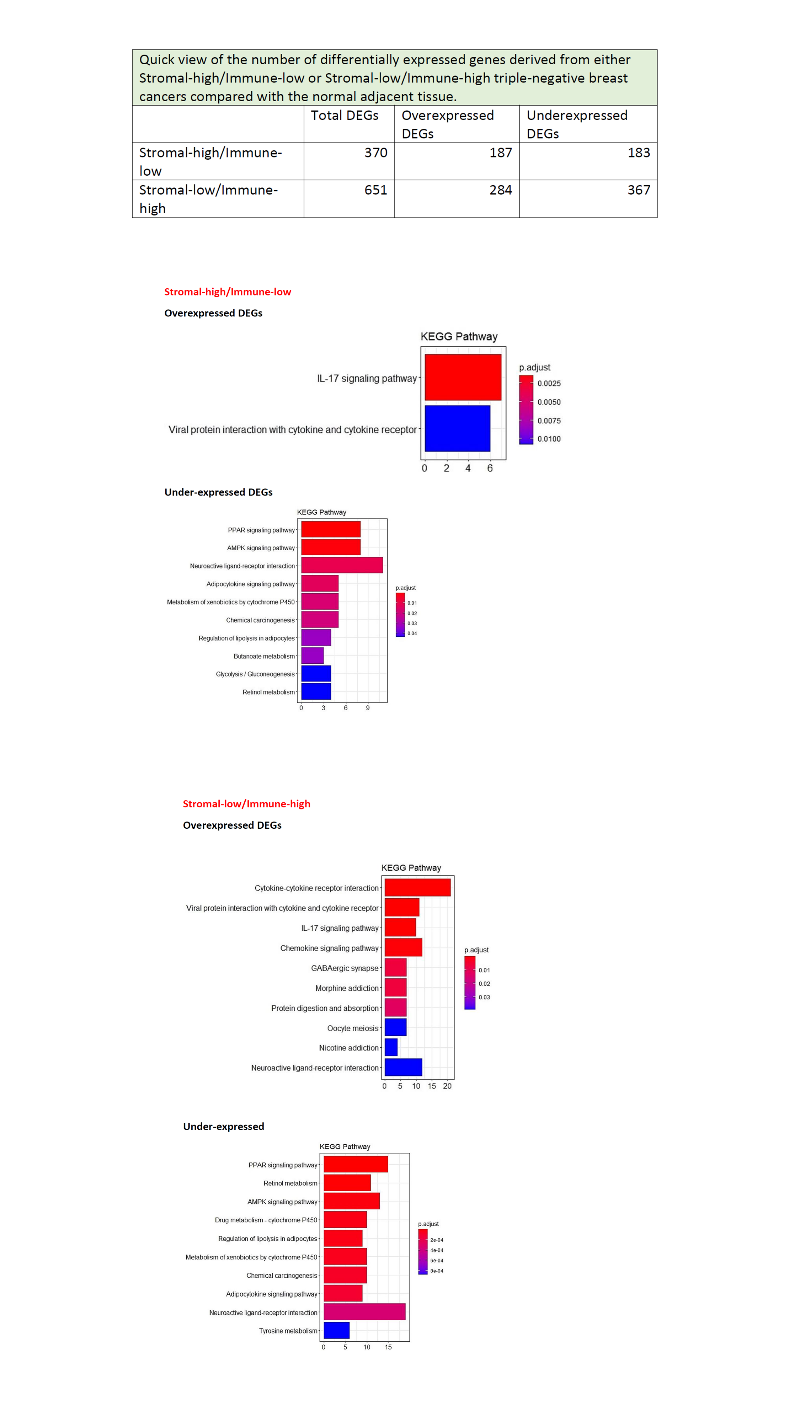


**Fig. S6.** Quick view of the number of differentially expressed genes in the context of SS-high/IS-low or SS-low/IS-high triple-negative breast cancer patients (compared to normal adjacent tissues). The KEGG pathway enrichment results are also presented.

**Supplementary Fig. S7a**

**
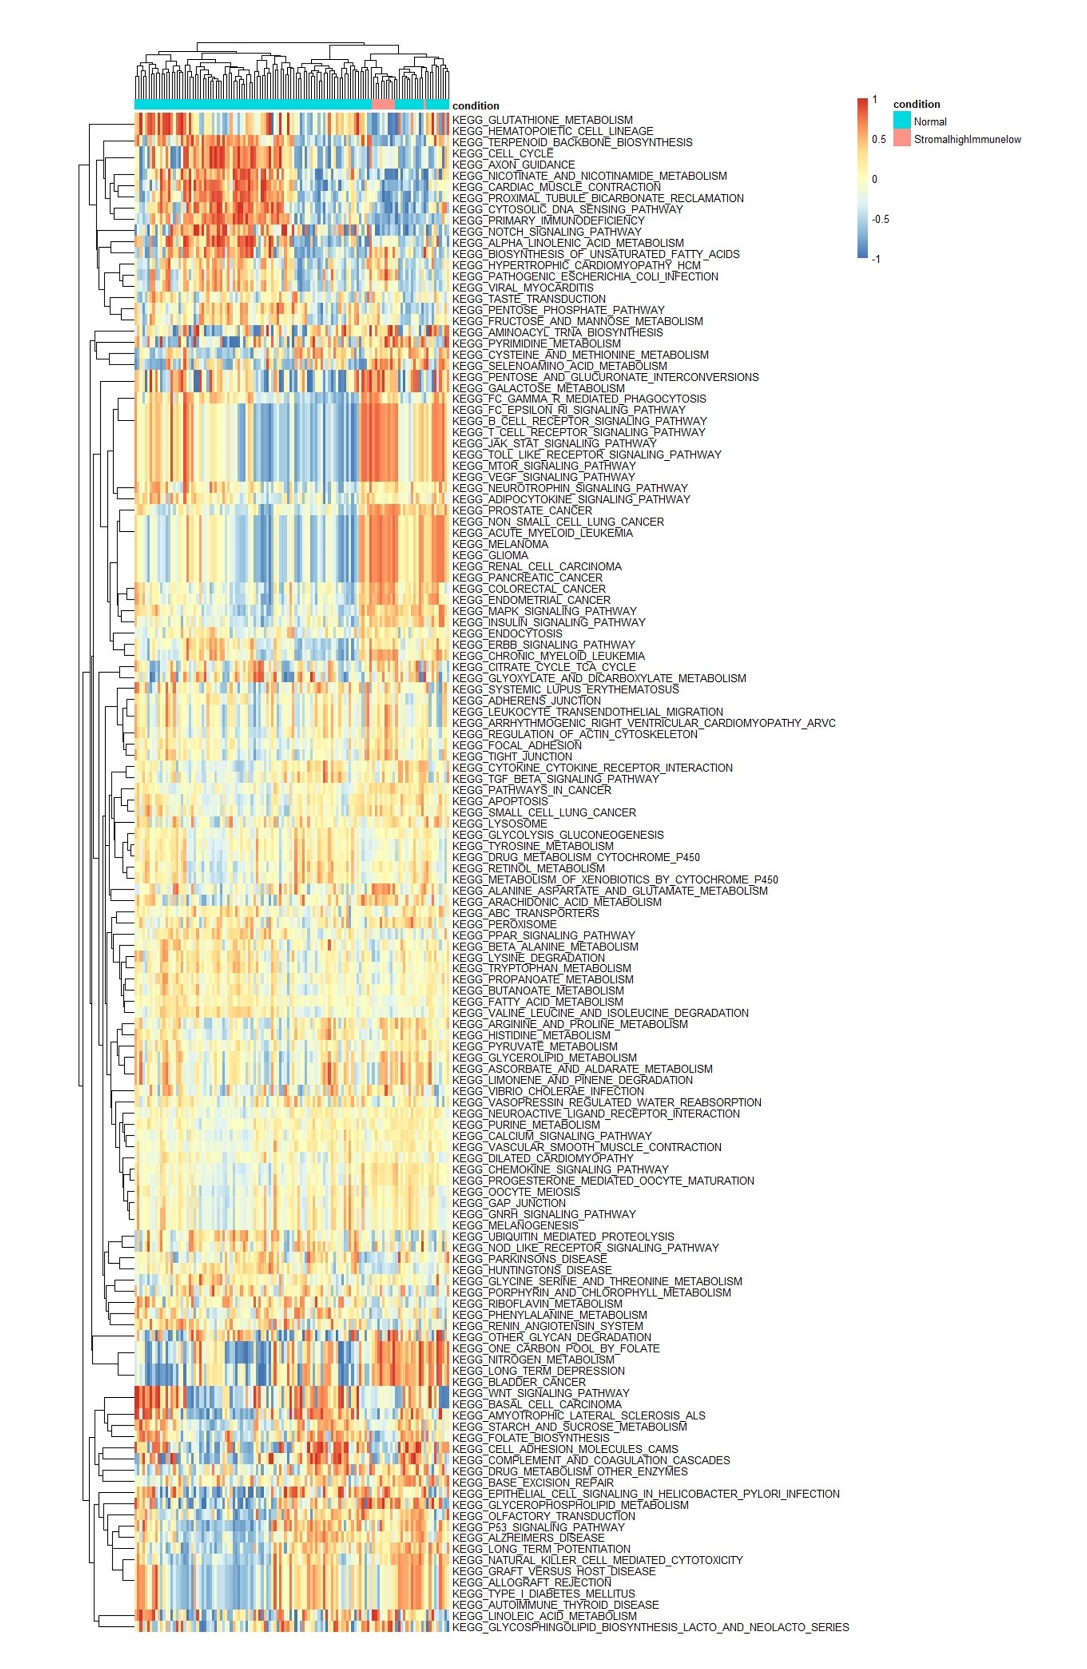
**

**Supplementary Fig. S7b**


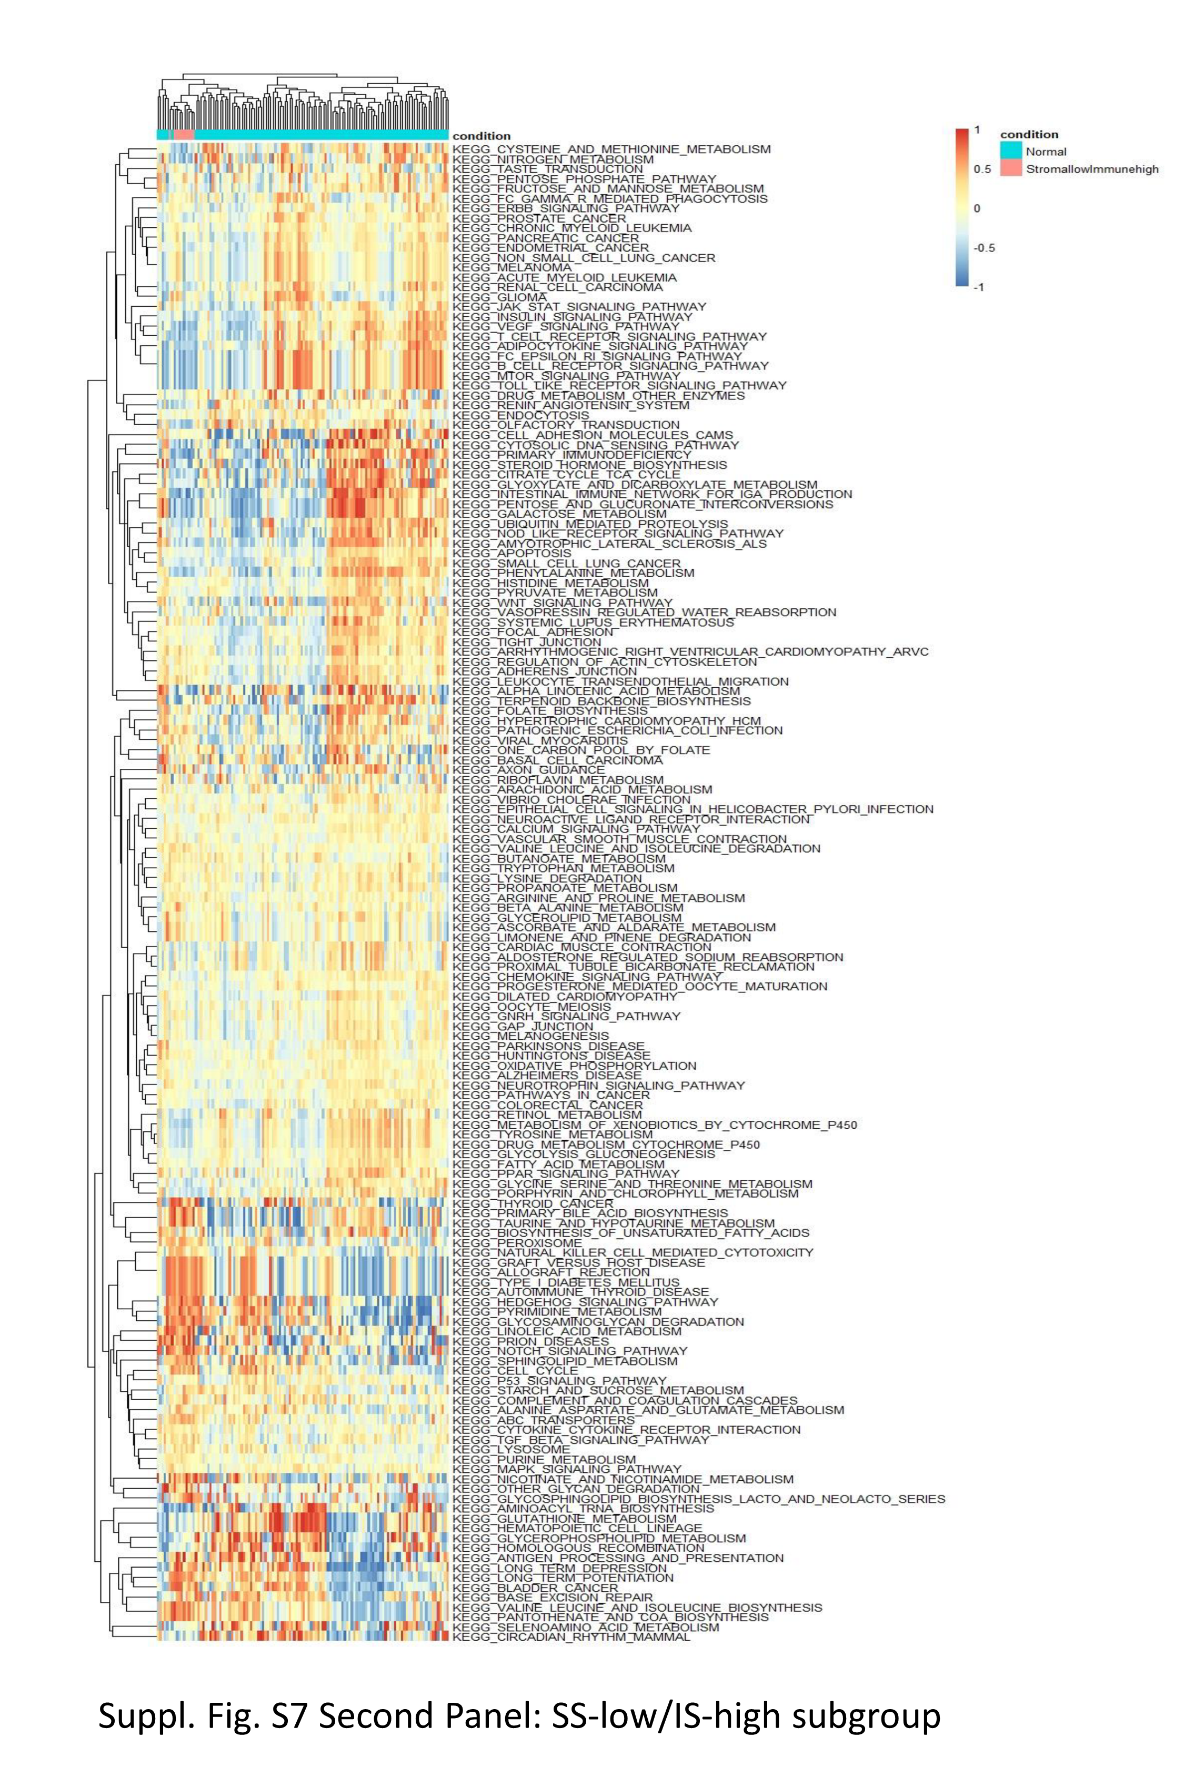


**Fig. S7.** Gene Set Variation Analysis showing the differential pathway activity. The first panel reveals the GSVA of the 370 DEGs of the SS-high/IS-low subgroup. The second panel shows the GSVA of the 651 DEGs of the SS-low/IS-high subgroup. Both demonstrate the gene enrichment in the JAK-STAT signaling, T cell receptor signaling, B cell receptor signaling, cytokine-cytokine receptor interaction, TGF-β signaling, and PPAR signaling pathways.

**Supplementary Fig. S8**

**
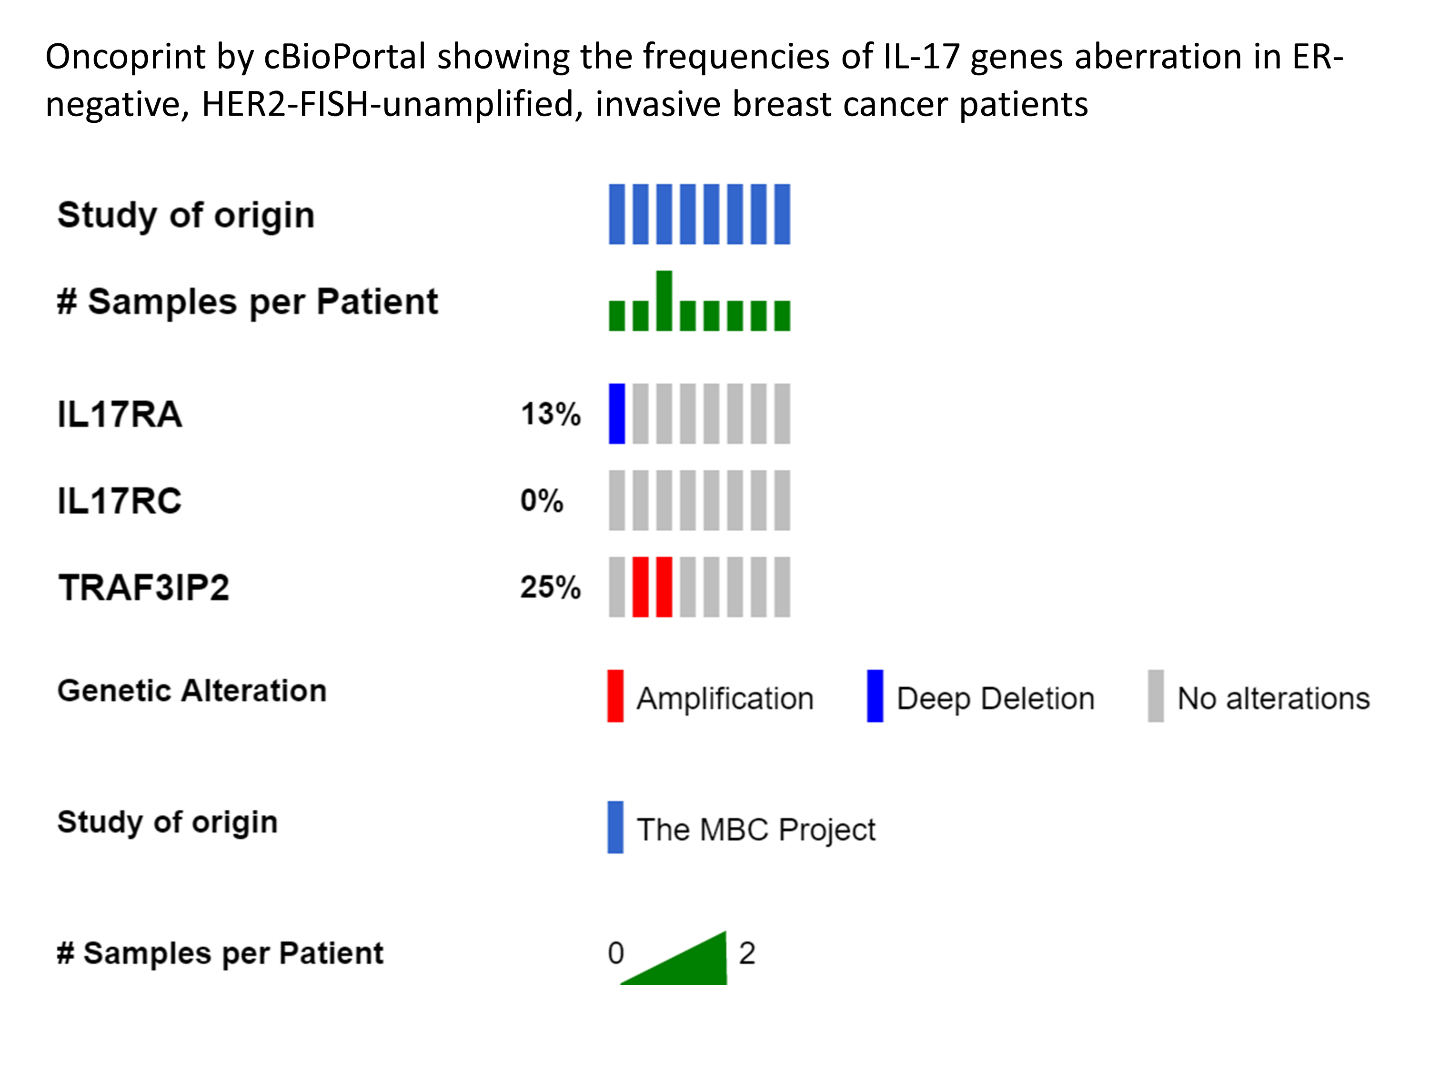
**

**Fig. S8.** Oncoprint (cBioPortal-based) showing the frequency of IL-17 and TRAF3IP2 gene aberrations in ER-negative, HER2-FISH-unamplified, invasive breast cancer patients. IL-17 is a proinflammatory cytokine that signals mainly via the TRAF3 interacting protein 2 (TRAF3IP2), an inflammatory mediator and upstream regulator of several crucial transcription factors such as AP-1 and NF-κB. On the cBioPortal platform, we discovered that 13% of ER-negative, HER2-FISH-unamplified breast cancers harbored IL17RA deep deletions and 25% harbored TRAF3IP2 amplifications.

**Supplementary Fig. S9**


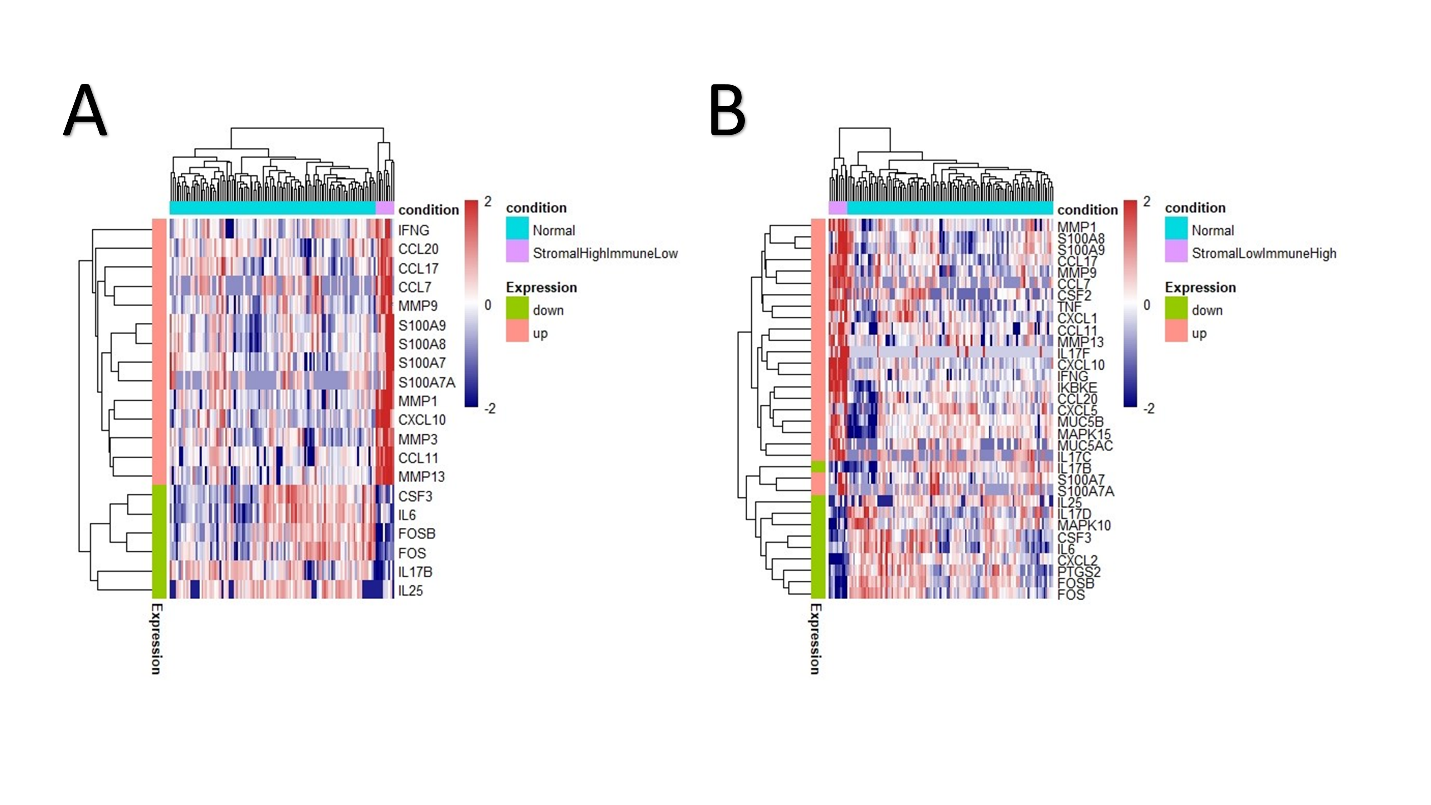


**Fig. S9.** All related genes in the IL-17 signaling pathway were interrogated for differential expression compared to the normal adjacent tissues in either stromal score-high/immune score-low (A) or stromal score-low/immune score-high (B) triple-negative breast cancer patients. The gene list can be found in the KEGG pathways (<https://www.genome.jp/pathway/map04657>).

**Supplementary Table S1**

| **Supplementary Table S1.** Gene list of the respective stromal and immune signatures | | |
| --- | --- | --- |
| Set | Stromal141 | Immune141 |
| **Description** | **Stromal Signature** | **Immune Signature** |
| 1 | *DCN* | *LCP2* |
| 2 | *PAPPA* | *LSP1* |
| 3 | *SFRP4* | *FYB* |
| 4 | *THBS2* | *PLEK* |
| 5 | *LY86* | *HCK* |
| 6 | *CXCL14* | *IL10RA* |
| 7 | *FOXF1* | *LILRB1* |
| 8 | *COL10A1* | *NCKAP1L* |
| 9 | *ACTG2* | *LAIR1* |
| 10 | *APBB1IP* | *NCF2* |
| 11 | *SH2D1A* | *CYBB* |
| 12 | *SULF1* | *PTPRC* |
| 13 | *MSR1* | *IL7R* |
| 14 | *C3AR1* | *LAPTM5* |
| 15 | *FAP* | *CD53* |
| 16 | *PTGIS* | *EVI2B* |
| 17 | *ITGBL1* | *SLA* |
| 18 | *BGN* | *ITGB2* |
| 19 | *CXCL12* | *GIMAP4* |
| 20 | *ECM2* | *MYO1F* |
| 21 | *FCGR2A* | *HCLS1* |
| 22 | *MS4A4A* | *MNDA* |
| 23 | *WISP1* | *IL2RG* |
| 24 | *COL1A2* | *CD48* |
| 25 | *MS4A6A* | *AOAH* |
| 26 | *EDNRA* | *CCL5* |
| 27 | *VCAM1* | *LTB* |
| 28 | *GPR124* | *GMFG* |
| 29 | *SCUBE2* | *GIMAP6* |
| 30 | *AIF1* | *GZMK* |
| 31 | *HEPH* | *LST1* |
| 32 | *LUM* | *GPR65* |
| 33 | *PTGER3* | *LILRB2* |
| 34 | *RUNX1T1* | *WIPF1* |
| 35 | *CDH5* | *CD37* |
| 36 | *PIK3R5* | *BIN2* |
| 37 | *RAMP3* | *FCER1G* |
| 38 | *LDB2* | *IKZF1* |
| 39 | *COX7A1* | *TYROBP* |
| 40 | *EDIL3* | *FGL2* |
| 41 | *DDR2* | *FLI1* |
| 42 | *FCGR2B* | *IRF8* |
| 43 | *LPPR4* | *ARHGAP15* |
| 44 | *COL15A1* | *SH2B3* |
| 45 | *AOC3* | *TNFRSF1B* |
| 46 | *ITIH3* | *DOCK2* |
| 47 | *FMO1* | *CD2* |
| 48 | *PRKG1* | *ARHGEF6* |
| 49 | *PLXDC1* | *CORO1A* |
| 50 | *VSIG4* | *LY96* |
| 51 | *COL6A3* | *LYZ* |
| 52 | *SGCD* | *ITGAL* |
| 53 | *COL3A1* | *TNFAIP3* |
| 54 | *F13A1* | *RNASE6* |
| 55 | *OLFML1* | *TGFB1* |
| 56 | *IGSF6* | *PSTPIP1* |
| 57 | *COMP* | *CST7* |
| 58 | *HGF* | *RGS1* |
| 59 | *GIMAP5* | *FGR* |
| 60 | *ABCA6* | *SELL* |
| 61 | *ITGAM* | *MICAL1* |
| 62 | *MAF* | *TRAF3IP3* |
| 63 | *ITM2A* | *ITGA4* |
| 64 | *CLEC7A* | *MAFB* |
| 65 | *ASPN* | *ARHGDIB* |
| 66 | *LRRC15* | *IL4R* |
| 67 | *ERG* | *RHOH* |
| 68 | *CD86* | *HLA-DPA1* |
| 69 | *TRAT1* | *NKG7* |
| 70 | *COL8A2* | *NCF4* |
| 71 | *TCF21* | *LPXN* |
| 72 | *CD93* | *ITK* |
| 73 | *CD163* | *SELPLG* |
| 74 | *GREM1* | *HLA-DPB1* |
| 75 | *LMOD1* | *CD3D* |
| 76 | *TLR2* | *CD300A* |
| 77 | *ZEB2* | *IL2RB* |
| 78 | *C1QB* | *ADCY7* |
| 79 | *KCNJ8* | *PTGER4* |
| 80 | *KDR* | *SRGN* |
| 81 | *CD33* | *CD247* |
| 82 | *RASGRP3* | *CCR7* |
| 83 | *TNFSF4* | *MSN* |
| 84 | *CCR1* | *ALOX5AP* |
| 85 | *CSF1R* | *PTGER2* |
| 86 | *BTK* | *RAC2* |
| 87 | *MFAP5* | *GBP2* |
| 88 | *MXRA5* | *VAV1* |
| 89 | *ISLR* | *CLEC2B* |
| 90 | *ARHGAP28* | *P2RY14* |
| 91 | *ZFPM2* | *NFKBIA* |
| 92 | *TLR7* | *S100A9* |
| 93 | *ADAM12* | *IFI30* |
| 94 | *OLFML2B* | *MFSD1* |
| 95 | *ENPP2* | *RASSF2* |
| 96 | *CILP* | *TPP1* |
| 97 | *SIGLEC1* | *RHOG* |
| 98 | *SPON2* | *CLEC4A* |
| 99 | *PLXNC1* | *GZMB* |
| 100 | *ADAMTS5* | *PVRIG* |
| 101 | *SAMSN1* | *S100A8* |
| 102 | *CH25H* | *CASP1* |
| 103 | *COL14A1* | *BCL2A1* |
| 104 | *EMCN* | *HLA-E* |
| 105 | *RGS4* | *KLRB1* |
| 106 | *PCDH12* | *GNLY* |
| 107 | *RARRES2* | *RAB27A* |
| 108 | *CD248* | *IL18RAP* |
| 109 | *PDGFRB* | *TPST2* |
| 110 | *C1QA* | *EMP3* |
| 111 | *COL5A3* | *GMIP* |
| 112 | *IGF1* | *LCK* |
| 113 | *SP140* | *IL32* |
| 114 | *TFEC* | *PTPRCAP* |
| 115 | *TNN* | *LGALS9* |
| 116 | *ATP8B4* | *CCDC69* |
| 117 | *ZNF423* | *SAMHD1* |
| 118 | *FRZB* | *TAP1* |
| 119 | *SERPING1* | *GBP1* |
| 120 | *ENPEP* | *CTSS* |
| 121 | *CD14* | *GZMH* |
| 122 | *DIO2* | *ADAM8* |
| 123 | *FPR1* | *GLRX* |
| 124 | *IL18R1* | *PRF1* |
| 125 | *HDC* | *CD69* |
| 126 | *TXNDC3* | *HLA-B* |
| 127 | *PDE2A* | *HLA-DMA* |
| 128 | *RSAD2* | *CD74* |
| 129 | *ITIH5* | *KLRK1* |
| 130 | *FASLG* | *PTPRE* |
| 131 | *MMP3* | *HLA-DRA* |
| 132 | *NOX4* | *VNN2* |
| 133 | *WNT2* | *TCIRG1* |
| 134 | *LRRC32* | *RABGAP1L* |
| 135 | *CXCL9* | *CSTA* |
| 136 | *ODZ4* | *ZAP70* |
| 137 | *FBLN2* | *HLA-F* |
| 138 | *EGFL6* | *HLA-G* |
| 139 | *IL1B* | *CD52* |
| 140 | *SPON1* | *CD302* |
| 141 | *CD200* | *CD27* |
